# Supplementary material for: Genome-Wide Gene Expression Analysis Reveals Unique Genes Signatures of Epithelial Reorganization in Primary Airway Epithelium Induced by Type-I, -II and -III Interferons
Source: MDPI journal article supplement (doi:10.3390/bios12110929), 2022-10-26

## Supplementary Materials

### Supplement Figure 1: Workflow of Air liquid interface culture and Microarray

Primary human bronchial epithelial cells of six genetically independent donors were first grown submerged and then transferred to polyester membrane. After fully differentiation, cells were harvested for microarray analysis of hybridized RNA.

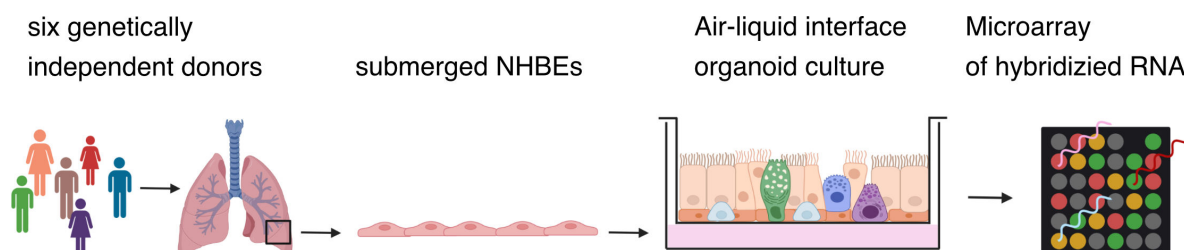

### Supplement Figure 2: Anti-inflammatory genes induced by IFN $\alpha$ , type-II and type-III IFNs

A) Heat map of induced anti-inflammatory genes by type-I IFNs (ttest IFN $\alpha$ -stimulated vs unstimulated). Duplicate gene names indicate the abundance of two or more transcripts of the same gene in the analysis and are marked with a cross. B) Heat map of induced anti-inflammatory genes by type-III IFNs (ttest IFN $\lambda$ 1-stimulated; IFN $\lambda$ 3-stimulated vs unstimulated) C) Heat map of induced anti-inflammatory genes by type-II IFNs (ttest IFN $\gamma$ -stimulated vs unstimulated).

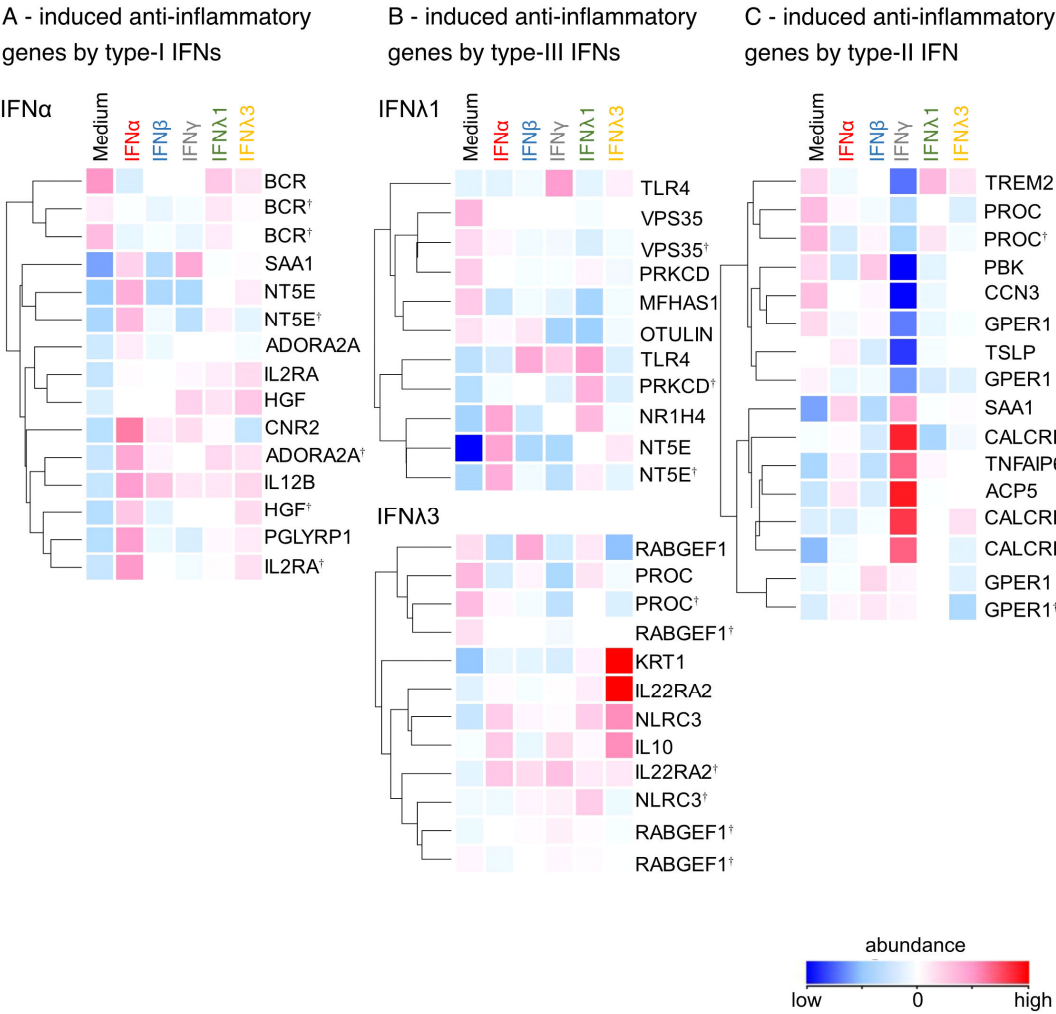

Supplement Figure 1

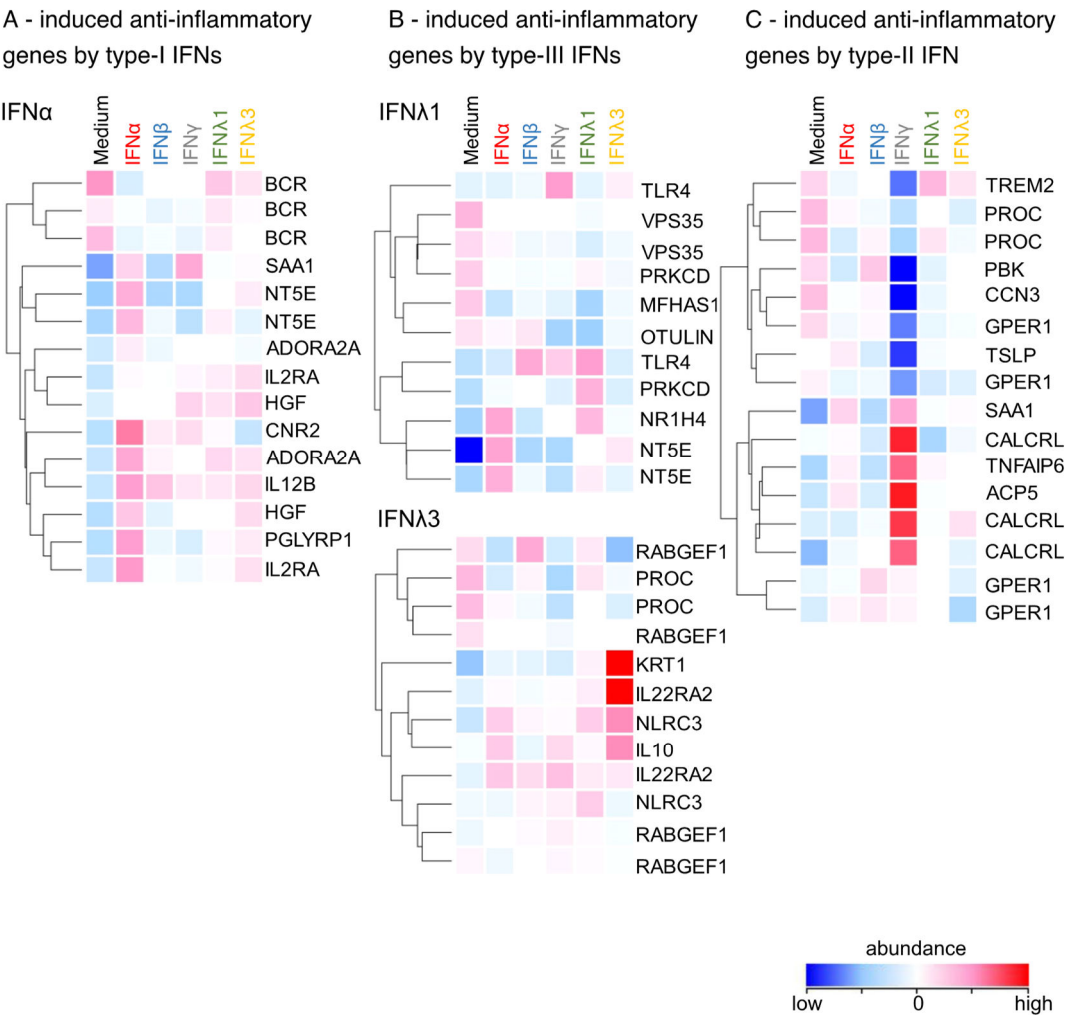

Supplement: s1 [file s1]
